# Supplementary material for: Phosphatidic acid phosphatase 1 impairs SARS-CoV-2 replication by affecting the glycerophospholipid metabolism pathway
Source: PubMed Central journal article supplement (PMC9305268; doi:10.7150/ijbs.73057), 2022-07-11
Supplement: ijbsv18p4744s1.pdf [file ijbsv18p4744s1.pdf]

## Supplementary information

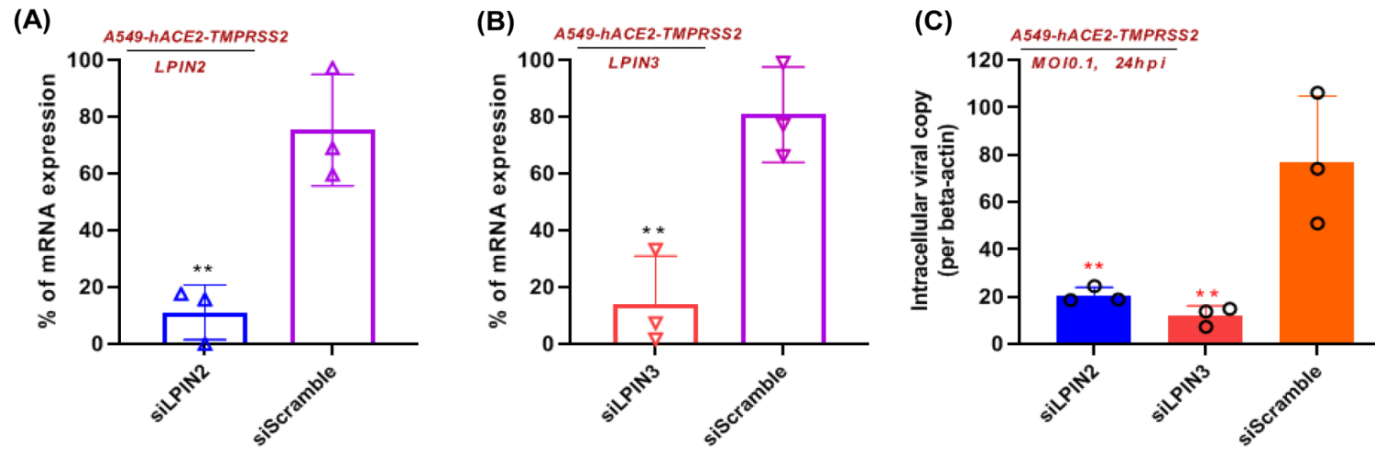

**Figure S1.** siRNA knockdown of LPIN2 and LPIN3 were performed in A549-hACE2-TMPRSS2 cells before SARS-CoV-2 infection for 24 hours (multiplicity of infection, MOI = 0.1). The individual siRNA knockdown efficiency of (A) LPIN2 and (B) LPIN3. Results are shown as % of scramble siRNA-treated. The viral yields in the cell lysates were determined by RT-qPCR and normalized with human  $\beta$ -actin. (C). For all statistical analysis above, \*\* $p < 0.01$  (Student's t-test).

**Table S1. Gradient elution program applied for UPLC-MS analysis**

| <b>Time<br/>(min)</b> | <b>Flow rate<br/>(mL/min)</b> | <b>Mobile phase<br/>A (%)</b> | <b>Mobile phase<br/>B (%)</b> | <b>Curve</b> |
|-----------------------|-------------------------------|-------------------------------|-------------------------------|--------------|
| Initial               | 0.4                           | 60                            | 40                            | 6            |
| 2                     | 0.4                           | 57                            | 43                            | 6            |
| 2.1                   | 0.4                           | 50                            | 50                            | 6            |
| 12                    | 0.4                           | 46                            | 54                            | 6            |
| 12.1                  | 0.4                           | 30                            | 70                            | 6            |
| 18                    | 0.4                           | 1                             | 99                            | 6            |
| 18.1                  | 0.4                           | 60                            | 40                            | 6            |
| 20                    | 0.4                           | 60                            | 40                            | 6            |

The mobile phase A was 60:40 acetonitrile:water (v/v) with 10 mM ammonium formate and 0.1% formic acid. The mobile phase B for positive mode was 90:10 isopropanol:acetonitrile (v/v) with 10 mM ammonium formate and 0.1% formic acid. The mobile phase B for negative mode was 90:10 isopropanol:acetonitrile (v/v) with 10 mM ammonium acetate.

**Table S2. List of the mixture of 14 internal standards with corresponding statistical information in cell based lipidomics study**

| Common Name            | Formula      | Detection mode | Adduct ion name | m/z      | Retention time (min) | CV of cell samples | CV of QC samples |
|------------------------|--------------|----------------|-----------------|----------|----------------------|--------------------|------------------|
| Ceramide C17           | C35H69NO3    | Positive       | [M+H-H2O]+      | 534.5351 | 11.61                | 8.33%              | 11.03%           |
| Ceramide C17           | C35H69NO3    | Positive       | [M+Na]+         | 574.5294 | 11.62                | 8.76%              | 0.04%            |
| Cholesterol d7         | C27H39D7O    | Positive       | [M-H2O+H]+      | 376.4038 | 6.66                 | 13.73%             | 0.13%            |
| DG (12:0/12:0/0:0)     | C27H52O5     | Positive       | [M+Na]+         | 479.3819 | 5.16                 | 11.37%             | 9.54%            |
| DG (12:0/12:0/0:0)     | C27H52O5     | Positive       | [M+NH4]+        | 474.4257 | 5.19                 | 11.93%             | 3.22%            |
| DG (18:1/2:0/0:0)      | C23H42O5     | Positive       | [M+Na]+         | 421.3032 | 2.87                 | 16.62%             | 0.99%            |
| DG (18:1/2:0/0:0)      | C23H42O5     | Positive       | [M+NH4]+        | 416.3467 | 2.88                 | 24.98%             | 6.67%            |
| LPC (17:0)             | C25H52NO7P   | Positive       | [M+H]+          | 510.3665 | 1.73                 | 9.54%              | 0.64%            |
| LPE (17:1)             | C22H44NO7P   | Positive       | [M+H]+          | 466.3037 | 1.37                 | 10.14%             | 0.07%            |
| PAF C-16-d4            | C26H50D4NO7P | Positive       | [M+H]+          | 528.4086 | 1.87                 | 6.59%              | 6.85%            |
| PC (12:0/13:0)         | C33H66NO8P   | Positive       | [M+H]+          | 636.4741 | 3.63                 | 9.18%              | 8.89%            |
| PE (17:0/17:0)         | C39H78NO8P   | Positive       | [M+H]+          | 720.5711 | 13.04                | 9.60%              | 5.78%            |
| SM (17:0)              | C40H81N2O6P  | Positive       | [M+H]+          | 717.5905 | 8.13                 | 22.68%             | 7.01%            |
| Sphingosine (d17:1)    | C17H35NO2    | Positive       | [M+H]+          | 286.2805 | 1.19                 | 10.99%             | 0.05%            |
| TG (17:0/17:1/17:0)-d5 | C54H97D5O6   | Positive       | [M+Na]+         | 874.8035 | 16.09                | 23.66%             | 4.70%            |
| TG (17:0/17:1/17:0)-d5 | C54H97D5O6   | Positive       | [M+NH4]+        | 869.7181 | 16.09                | 23.83%             | 5.08%            |
| Ceramide C17           | C35H69NO3    | Negative       | [M+Cl]-         | 586.4970 | 12.64                | 18.78%             | 3.23%            |
| Arachidonic acid-d8    | C20H24D8O2   | Negative       | [M-H]-          | 311.2823 | 2.44                 | 24.44%             | 0.58%            |
| LPE (17:1)             | C22H44NO7P   | Negative       | [M-H]-          | 464.2783 | 1.42                 | 11.86%             | 2.74%            |
| PE (17:0/17:0)         | C39H78NO8P   | Negative       | [M-H]-          | 718.5383 | 13.24                | 22.85%             | 9.62%            |
| PG (17:0/17:0)         | C40H79O10P   | Negative       | [M-H]-          | 749.5338 | 11.13                | 7.23%              | 6.45%            |

Abbreviations: DG, diacylglycerol; LPC, lysophosphatidylcholine; LPE, lysophosphatidylethanolamine; PC, phosphatidylcholine; PE, phosphatidylethanolamine; PG, phosphatidylglycerol; SM, sphingomyelin; TG, triacylglycerol.

**Table S3. Lipids that were significantly different between SARS-CoV-2-infected and mock-infected Caco-2 cells**

| Significant lipids      | Detection mode | Retention time (min) | Accurate mass in detection mode | Adduct ion name                   | lipids species | Identification information | p-Value in 8h SARS-CoV-2 infected Cell vs Mock | Fold change in 8h SARS-CoV-2 infected Cell vs Mock | p-Value in 24h SARS-CoV-2 infected Cell vs Mock | Fold change in 24h SARS-CoV-2 infected Cell vs Mock |
|-------------------------|----------------|----------------------|---------------------------------|-----------------------------------|----------------|----------------------------|------------------------------------------------|----------------------------------------------------|-------------------------------------------------|-----------------------------------------------------|
| Sphinganine             | positive       | 1.375                | 302.30566                       | [M+H] <sup>+</sup>                | SPB            | STD                        | 0.0007                                         | 0.59                                               | NS                                              | NS                                                  |
| Cer(d18:0/23:0)         | negative       | 14.534               | 682.63507                       | [M+HCOO] <sup>-</sup>             | Cer            | MS/MS                      | 0.0001                                         | 0.48                                               | NS                                              | NS                                                  |
| Cer(d18:0/26:1)         | negative       | 14.723               | 722.66699                       | [M+HCOO] <sup>-</sup>             | Cer            | MS/MS                      | 0.0001                                         | 0.29                                               | NS                                              | NS                                                  |
| Cer(d18:0/25:1)         | positive       | 14.287               | 664.66095                       | [M+H] <sup>+</sup>                | Cer            | MS/MS                      | 0.0001                                         | 0.43                                               | NS                                              | NS                                                  |
| Cer(d18:1/16:0)         | positive       | 9.173                | 538.52069                       | [M+H] <sup>+</sup>                | Cer            | STD                        | 0.0185                                         | 0.55                                               | NS                                              | NS                                                  |
| Cer(d18:0/24:1)         | negative       | 14.275               | 694.63568                       | [M+HCOO] <sup>-</sup>             | Cer            | MS/MS                      | 0.0003                                         | 0.40                                               | NS                                              | NS                                                  |
| Cer(d18:0/22:0)         | negative       | 14.312               | 668.61938                       | [M+HCOO] <sup>-</sup>             | Cer            | MS/MS                      | 0.0004                                         | 0.39                                               | NS                                              | NS                                                  |
| Cer(d44:0)              | negative       | 15.157               | 724.68146                       | [M+HCOO] <sup>-</sup>             | Cer            | MS/MS                      | 0.0036                                         | 0.50                                               | NS                                              | NS                                                  |
| Cer(d18:1/22:0)         | negative       | 14.037               | 680.61829                       | [M-H] <sup>-</sup>                | Cer            | MS/MS                      | 0.0040                                         | 0.45                                               | NS                                              | NS                                                  |
| Cer(d43:0)              | positive       | 13.629               | 666.6416                        | [M+NH <sub>4</sub> ] <sup>+</sup> | Cer            | MS/MS                      | 0.0050                                         | 0.65                                               | NS                                              | NS                                                  |
| PS(16:0/20:4)           | negative       | 5.722                | 782.49744                       | [M-H] <sup>-</sup>                | PS             | MS/MS                      | 0.0050                                         | 1.60                                               | NS                                              | NS                                                  |
| Cer(d18:1/26:1)         | negative       | 14.336               | 720.64746                       | [M+HCOO] <sup>-</sup>             | Cer            | MS/MS                      | 0.0111                                         | 0.52                                               | NS                                              | NS                                                  |
| Cer(d18:0/22:1)         | negative       | 13.784               | 666.60315                       | [M+HCOO] <sup>-</sup>             | Cer            | MS/MS                      | 0.0158                                         | 0.37                                               | NS                                              | NS                                                  |
| Cer(d18:0/16:0)         | negative       | 10.911               | 584.52637                       | [M+HCOO] <sup>-</sup>             | Cer            | STD                        | 0.0326                                         | 0.34                                               | NS                                              | NS                                                  |
| PG(16:1/18:2)           | negative       | 4.836                | 743.48297                       | [M-H] <sup>-</sup>                | PG             | MS/MS                      | 0.0326                                         | 0.45                                               | NS                                              | NS                                                  |
| DG(16:0/16:0/0:0)       | positive       | 13.259               | 591.49634                       | [M+Na] <sup>+</sup>               | DG             | MS/MS                      | 0.0327                                         | 1.78                                               | NS                                              | NS                                                  |
| Cer(d38:1)              | negative       | 13.187               | 638.56891                       | [M+HCOO] <sup>-</sup>             | Cer            | MS/MS                      | 0.0370                                         | 0.48                                               | NS                                              | NS                                                  |
| PG(16:1/18:1)           | positive       | 5.644                | 764.54572                       | [M+NH <sub>4</sub> ] <sup>+</sup> | PG             | MS/MS                      | 0.0375                                         | 0.64                                               | NS                                              | NS                                                  |
| Cer(d16:0/16:0)         | negative       | 8.093                | 556.49347                       | [M+HCOO] <sup>-</sup>             | Cer            | MS/MS                      | 0.0393                                         | 0.39                                               | NS                                              | NS                                                  |
| PA(38:4)                | negative       | 12.737               | 723.48206                       | [M-H] <sup>-</sup>                | PA             | MS/MS                      | 0.0402                                         | 1.58                                               | NS                                              | NS                                                  |
| Cer(d18:0/18:0)         | negative       | 13.176               | 612.55798                       | [M+HCOO] <sup>-</sup>             | Cer            | STD                        | 0.0453                                         | 0.47                                               | NS                                              | NS                                                  |
| Cer(d18:0/20:0)         | positive       | 13.6                 | 596.59796                       | [M+H] <sup>+</sup>                | Cer            | MS/MS                      | 0.0001                                         | 0.52                                               | NS                                              | NS                                                  |
| Cer(d18:1/23:1)         | positive       | 13.659               | 634.61414                       | [M+H] <sup>+</sup>                | Cer            | MS/MS                      | 0.0102                                         | 0.51                                               | NS                                              | NS                                                  |
| Cer(d18:0/24:0)         | positive       | 14.544               | 652.66162                       | [M+H] <sup>+</sup>                | Cer            | MS/MS                      | 0.0003                                         | 0.40                                               | NS                                              | NS                                                  |
| CL(16:0/18:1,16:1/20:4) | negative       | 15.411               | 1423.96094                      | [M-H] <sup>-</sup>                | CL             | MS/MS                      | NS                                             | NS                                                 | 0.0498                                          | 1.28                                                |
| CL(32:1/34:1)           | negative       | 15.427               | 1375.96179                      | [M-H] <sup>-</sup>                | CL             | MS/MS                      | NS                                             | NS                                                 | 0.0306                                          | 1.33                                                |
| PC(O-18:1/0:0)-B        | positive       | 2.183                | 508.37604                       | [M+H] <sup>+</sup>                | EtherLPC       | MS/MS                      | NS                                             | NS                                                 | 0.0469                                          | 0.71                                                |

|                  |          |        |           |                                   |          |       |    |    |        |      |
|------------------|----------|--------|-----------|-----------------------------------|----------|-------|----|----|--------|------|
| PC(O-18:1/0;0)-A | positive | 1.676  | 508.37607 | [M+H] <sup>+</sup>                | EtherLPC | MS/MS | NS | NS | 0.0230 | 0.54 |
| PC(O-18:2/0:0)   | positive | 1.617  | 506.3595  | [M+H] <sup>+</sup>                | EtherLPC | MS/MS | NS | NS | 0.0077 | 0.56 |
| PE(O-18:2/0:0)   | negative | 1.748  | 462.29834 | [M-H] <sup>-</sup>                | EtherLPC | MS/MS | NS | NS | 0.0306 | 0.72 |
| PE(P-16:0/0:0)   | negative | 1.675  | 436.28333 | [M-H] <sup>-</sup>                | EtherLPE | MS/MS | NS | NS | 0.0306 | 0.75 |
| TG(57:3)         | positive | 16.397 | 944.86566 | [M+NH <sub>4</sub> ] <sup>+</sup> | TG       | MS/MS | NS | NS | 0.0230 | 1.36 |

Remarks: MSMS = lipids that were confirmed with fragment pattern of database; STD = lipids that were confirmed with authentic standards; The 'O-' prefix is used to indicate the presence of an alkyl ether substituent, e.g., PC (O-16:0/0:0), whereas the 'P-' prefix is used for the 1Z-alkenyl ether (Plasmalogen) substituent, e.g., PE (P-16:0/16:0). Abbreviations: Cer, ceramide; CL, cardiolipin; DG, diacylglycerol; EtherLPC, ether-linked lysophosphatidylcholine; EtherLPE, ether-linked lysophosphatidylethanolamine; EtherPE, ether-linked phosphatidylethanolamine; LPC, lysophosphatidylcholine; PA, phosphatidate; PG, Phosphatidylglycerol; PS, phosphatidylserine; TG, triacylglycerol.

**Table S4. Lipids that were significantly different between SARS-CoV-1-infected and mock-infected Caco-2 cells**

| Significant lipids | Detection mode | Retention time (min) | Accurate mass in detection mode | Adduct ion name                   | lipids species | Identification information | p-Value in 8h SARS-CoV-1 infected Cell vs Mock | Fold change in 8h SARS-CoV-1 infected Cell vs Mock | p-Value in 24h SARS-CoV-1 infected Cell vs Mock | Fold change in 24h SARS-CoV-1 infected Cell vs Mock |
|--------------------|----------------|----------------------|---------------------------------|-----------------------------------|----------------|----------------------------|------------------------------------------------|----------------------------------------------------|-------------------------------------------------|-----------------------------------------------------|
| Cer(d18:0/16:0)    | positive       | 10.15                | 540.5361                        | [M+H] <sup>+</sup>                | Cer            | STD                        | 0.0376                                         | 0.64                                               | NS                                              | NS                                                  |
| Cer(d18:1/22:0)    | positive       | 13.58                | 622.6140                        | [M+H] <sup>+</sup>                | Cer            | MS/MS                      | 0.0409                                         | 0.72                                               | NS                                              | NS                                                  |
| CL(30:1/36:1)      | positive       | 15.33                | 1395.0079                       | [M+NH <sub>4</sub> ] <sup>+</sup> | CL             | MS/MS                      | 0.0427                                         | 1.35                                               | NS                                              | NS                                                  |
| CL(32:1/34:2)      | positive       | 15.07                | 1392.9904                       | [M+NH <sub>4</sub> ] <sup>+</sup> | CL             | MS/MS                      | 0.0347                                         | 1.27                                               | NS                                              | NS                                                  |
| CL(32:1/36:1)      | positive       | 15.59                | 1423.0391                       | [M+NH <sub>4</sub> ] <sup>+</sup> | CL             | MS/MS                      | 0.0432                                         | 1.40                                               | NS                                              | NS                                                  |
| CL(32:2/34:2)      | positive       | 14.83                | 1390.9760                       | [M+NH <sub>4</sub> ] <sup>+</sup> | CL             | MS/MS                      | 0.0436                                         | 1.26                                               | NS                                              | NS                                                  |
| CL(34:1/34:2)      | positive       | 15.33                | 1421.0228                       | [M+NH <sub>4</sub> ] <sup>+</sup> | CL             | MS/MS                      | 0.0283                                         | 1.30                                               | NS                                              | NS                                                  |
| CL(34:1/36:2)      | positive       | 15.59                | 1449.0543                       | [M+NH <sub>4</sub> ] <sup>+</sup> | CL             | MS/MS                      | 0.0398                                         | 1.33                                               | NS                                              | NS                                                  |
| CL(34:2/34:2)      | positive       | 15.07                | 1419.0071                       | [M+NH <sub>4</sub> ] <sup>+</sup> | CL             | MS/MS                      | 0.0336                                         | 1.26                                               | NS                                              | NS                                                  |
| CL(34:2/36:2)      | positive       | 15.33                | 1447.0377                       | [M+NH <sub>4</sub> ] <sup>+</sup> | CL             | MS/MS                      | 0.0353                                         | 1.27                                               | NS                                              | NS                                                  |
| CL(34:2/36:3)      | positive       | 15.12                | 1445.0233                       | [M+NH <sub>4</sub> ] <sup>+</sup> | CL             | MS/MS                      | 0.0356                                         | 1.26                                               | NS                                              | NS                                                  |
| DG(16:0/16:0/0:0)  | positive       | 13.25                | 586.5421                        | [M+NH <sub>4</sub> ] <sup>+</sup> | DG             | MS/MS                      | 0.0175                                         | 1.34                                               | NS                                              | NS                                                  |
| DG(18:1/20:4)      | positive       | 12.18                | 660.5589                        | [M+NH <sub>4</sub> ] <sup>+</sup> | DG             | MS/MS                      | 0.0353                                         | 0.78                                               | NS                                              | NS                                                  |
| LNAPE(18:1/N-20:1) | negative       | 9.90                 | 770.5695                        | [M-H] <sup>-</sup>                | LNAPE          | MS/MS                      | 0.0241                                         | 1.27                                               | NS                                              | NS                                                  |
| PE(16:0/18:1)      | negative       | 10.48                | 716.5220                        | [M-H] <sup>-</sup>                | PE             | MS/MS                      | 0.0241                                         | 1.26                                               | NS                                              | NS                                                  |
| PE(16:1/18:1)      | negative       | 8.09                 | 714.5078                        | [M-H] <sup>-</sup>                | PE             | MS/MS                      | 0.0241                                         | 1.26                                               | NS                                              | NS                                                  |
| PE(18:0/16:1)      | negative       | 7.26                 | 716.5241                        | [M-H] <sup>-</sup>                | PE             | MS/MS                      | 0.0241                                         | 1.32                                               | NS                                              | NS                                                  |
| PE(18:0/18:1)      | negative       | 9.61                 | 744.5544                        | [M-H] <sup>-</sup>                | PE             | MS/MS                      | 0.0241                                         | 1.27                                               | NS                                              | NS                                                  |
| PE(18:1/18:1)      | negative       | 7.46                 | 742.5394                        | [M-H] <sup>-</sup>                | PE             | MS/MS                      | 0.0241                                         | 1.30                                               | NS                                              | NS                                                  |
| PE(38:4)           | positive       | 10.02                | 768.5557                        | [M+H] <sup>+</sup>                | PE             | MS/MS                      | 0.0483                                         | 1.27                                               | NS                                              | NS                                                  |
| PE(P-16:0/18:2)    | negative       | 9.19                 | 698.5118                        | [M-H] <sup>-</sup>                | EtherPE        | MS/MS                      | 0.0241                                         | 1.28                                               | NS                                              | NS                                                  |
| PE(P-18:0/20:4)    | negative       | 9.31                 | 748.5284                        | [M-H] <sup>-</sup>                | EtherPE        | MS/MS                      | 0.0241                                         | 1.28                                               | NS                                              | NS                                                  |
| PI(36:1)           | positive       | 8.74                 | 882.6074                        | [M+NH <sub>4</sub> ] <sup>+</sup> | PI             | MS/MS                      | 0.0398                                         | 1.27                                               | NS                                              | NS                                                  |

|                      |          |       |          |                      |          |       |        |      |        |      |
|----------------------|----------|-------|----------|----------------------|----------|-------|--------|------|--------|------|
| PS(38:5)             | positive | 6.26  | 810.5299 | [M+H] <sup>+</sup>   | PS       | MS/MS | 0.0356 | 1.26 | NS     | NS   |
| SM(d42:2)            | positive | 13.22 | 835.6670 | [M+Na] <sup>+</sup>  | SM       | MS/MS | 0.0429 | 1.26 | NS     | NS   |
| SM(d43:3)            | positive | 13.00 | 825.6821 | [M+H] <sup>+</sup>   | SM       | MS/MS | 0.0283 | 1.30 | NS     | NS   |
| TG(O-18:0/16:0/16:1) | positive | 16.17 | 834.7936 | [M+NH4] <sup>+</sup> | EtherTG  | MS/MS | 0.0358 | 1.26 | NS     | NS   |
| TG(O-18:1/16:1/16:1) | positive | 15.89 | 832.7758 | [M+NH4] <sup>+</sup> | EtherTG  | MS/MS | 0.0364 | 1.25 | NS     | NS   |
| TG(O-18:1/16:1/18:1) | positive | 16.17 | 860.8087 | [M+NH4] <sup>+</sup> | EtherTG  | MS/MS | 0.0365 | 1.27 | NS     | NS   |
| Oleic acid           | negative | 3.07  | 281.2488 | [M-H] <sup>-</sup>   | FA       | STD   | NS     | NS   | 0.0034 | 0.52 |
| PC(14:0/0:0)         | positive | 1.03  | 468.3088 | [M+H] <sup>+</sup>   | LPC      | MS/MS | NS     | NS   | 0.0022 | 0.31 |
| PC(15:1/0:0)         | positive | 1.51  | 480.3224 | [M+H] <sup>+</sup>   | LPC      | MS/MS | NS     | NS   | 0.0069 | 0.57 |
| PC(16:0/0:0)         | positive | 1.38  | 518.3216 | [M+Na] <sup>+</sup>  | LPC      | MS/MS | NS     | NS   | 0.0008 | 0.13 |
| PC(16:1/0:0)         | positive | 1.08  | 494.3257 | [M+H] <sup>+</sup>   | LPC      | MS/MS | NS     | NS   | 0.0024 | 0.50 |
| PC(18:0/0:0)         | positive | 1.94  | 524.3718 | [M+H] <sup>+</sup>   | LPC      | MS/MS | NS     | NS   | 0.0007 | 0.48 |
| PC(18:1/0:0)-B       | positive | 1.43  | 544.3383 | [M+Na] <sup>+</sup>  | LPC      | MS/MS | NS     | NS   | 0.0026 | 0.24 |
| PC(20:0/0:0)         | positive | 2.81  | 552.4027 | [M+H] <sup>+</sup>   | LPC      | MS/MS | NS     | NS   | 0.0076 | 0.61 |
| PC(20:1/0:0)         | positive | 2.00  | 550.3871 | [M+H] <sup>+</sup>   | LPC      | MS/MS | NS     | NS   | 0.0003 | 0.47 |
| PC(O-16:0/0:0)       | positive | 1.61  | 482.3610 | [M+H] <sup>+</sup>   | EtherLPC | MS/MS | NS     | NS   | 0.0003 | 0.32 |
| PC(O-18:1/0:0)-A     | positive | 1.68  | 508.3761 | [M+H] <sup>+</sup>   | EtherLPC | MS/MS | NS     | NS   | 0.0001 | 0.30 |
| PC(O-18:1/0:0)-B     | positive | 2.18  | 508.3760 | [M+H] <sup>+</sup>   | EtherLPC | MS/MS | NS     | NS   | 0.0012 | 0.60 |
| PC(O-18:2/0:0)       | positive | 1.62  | 506.3595 | [M+H] <sup>+</sup>   | EtherLPC | MS/MS | NS     | NS   | 0.0001 | 0.38 |
| PE(16:0/0:0)         | negative | 1.47  | 452.2780 | [M-H] <sup>-</sup>   | LPE      | MS/MS | NS     | NS   | 0.0001 | 0.53 |
| PE(16:1/0:0)         | negative | 1.12  | 450.2614 | [M-H] <sup>-</sup>   | LPE      | MS/MS | NS     | NS   | 0.0008 | 0.61 |
| PE(18:0/0:0)         | positive | 2.02  | 482.3252 | [M+H] <sup>+</sup>   | LPE      | MS/MS | NS     | NS   | 0.0062 | 0.66 |
| PE(18:1/0:0)         | negative | 1.54  | 478.2945 | [M-H] <sup>-</sup>   | LPE      | MS/MS | NS     | NS   | 0.0001 | 0.58 |
| PE(O-18:0/0:0)       | negative | 1.64  | 466.3289 | [M-H] <sup>-</sup>   | EtherLPE | MS/MS | NS     | NS   | 0.0001 | 0.29 |
| PE(O-18:2/0:0)       | negative | 1.75  | 462.2983 | [M-H] <sup>-</sup>   | EtherLPE | MS/MS | NS     | NS   | 0.0001 | 0.57 |
| PE(P-16:0/0:0)       | negative | 1.68  | 436.2833 | [M-H] <sup>-</sup>   | EtherLPE | MS/MS | NS     | NS   | 0.0001 | 0.60 |
| PG(18:1/0:0)         | negative | 1.17  | 509.2872 | [M-H] <sup>-</sup>   | LPG      | MS/MS | NS     | NS   | 0.0002 | 0.55 |

Remarks: MSMS = lipids that were confirmed with fragment pattern of database; STD = lipids that were confirmed with authentic standards; The 'O-' prefix is used to indicate the presence of an alkyl ether substituent, e.g., PC (O-16:0/0:0), whereas the 'P-' prefix is used for the 1Z-alkenyl ether (Plasmalogen) substituent, e.g., PE (P-16:0/16:0). Abbreviations: Cer, ceramide; CL, cardiolipin; DG, diacylglycerol; EtherLPC, ether-linked lysophosphatidylcholine; EtherLPE, ether-linked lysophosphatidylethanolamine; EtherPC, ether-linked phosphatidylcholine; EtherPE, ether-linked phosphatidylethanolamine; LNAPE, n-acyl-lysophosphatidylethanolamine; LPC, lysophosphatidylcholine; PE, phosphatidylethanolamine; PG, Phosphatidylglycerol; PI, phosphatidylinositol; PS, phosphatidylserine; TG, triacylglycerol.



**Table S5. Lipids that were significantly different between SARS-CoV-1 and SARS-CoV-2 infected cells**

| Lipids id | Significant lipids | Detection mode | Retention time | Accurate mass in detection mode | Adduct ion name | Lipids species | Identification information | p-Value in 8h SARS-CoV-2 infected Cell vs SARS-CoV-1 | Fold change in 8h SARS-CoV-2 infected Cell vs SARS-CoV-1 |
|-----------|--------------------|----------------|----------------|---------------------------------|-----------------|----------------|----------------------------|------------------------------------------------------|----------------------------------------------------------|
| 495       | Cer(d16:0/16:0)    | negative       | 8.09           | 556.49347                       | [M+HCOO]-       | Cer            | MS/MS                      | 0.0189                                               | 0.50                                                     |
| 536       | Cer(d18:0/16:0)    | negative       | 10.91          | 584.52637                       | [M+HCOO]-       | Cer            | STD                        | 0.0278                                               | 0.50                                                     |
| 588       | Cer(d18:0/18:0)    | negative       | 13.18          | 612.55798                       | [M+HCOO]-       | Cer            | STD                        | 0.0323                                               | 0.60                                                     |
| 1393      | Cer(d18:0/20:0)    | negative       | 13.60          | 596.59796                       | [M+H]+          | Cer            | MS/MS                      | 0.0269                                               | 0.66                                                     |
| 704       | Cer(d18:0/22:0)    | negative       | 14.31          | 668.61938                       | [M+HCOO]-       | Cer            | MS/MS                      | 0.0027                                               | 0.54                                                     |
| 698       | Cer(d18:0/22:1)    | negative       | 13.78          | 666.60315                       | [M+HCOO]-       | Cer            | MS/MS                      | 0.0045                                               | 0.49                                                     |
| 753       | Cer(d18:0/23:0)    | negative       | 14.53          | 682.63507                       | [M+HCOO]-       | Cer            | MS/MS                      | 0.0038                                               | 0.60                                                     |
| 798       | Cer(d18:0/24:0)    | negative       | 14.76          | 696.65112                       | [M+HCOO]-       | Cer            | MS/MS                      | 0.0041                                               | 0.53                                                     |
| 794       | Cer(d18:0/24:1)    | negative       | 14.28          | 694.63568                       | [M+HCOO]-       | Cer            | MS/MS                      | 0.0027                                               | 0.51                                                     |
| 908       | Cer(d18:0/26:1)    | negative       | 14.72          | 722.66699                       | [M+HCOO]-       | Cer            | MS/MS                      | 0.0027                                               | 0.40                                                     |
| 747       | Cer(d18:1/22:0)    | negative       | 14.04          | 680.61829                       | [M-H]-          | Cer            | MS/MS                      | 0.0027                                               | 0.56                                                     |
| 1527      | Cer(d18:1/22:1)    | positive       | 13.39          | 620.59863                       | [M+H]+          | Cer            | MS/MS                      | 0.0255                                               | 0.66                                                     |
| 1614      | Cer(d18:1/23:1)    | positive       | 13.66          | 634.61414                       | [M+H]+          | Cer            | MS/MS                      | 0.0242                                               | 0.66                                                     |
| 836       | Cer(d18:1/24:1)    | negative       | 14.11          | 706.63373                       | [M+Hac-H]-      | Cer            | MS/MS                      | 0.0202                                               | 0.66                                                     |
| 894       | Cer(d18:1/26:1)    | negative       | 14.34          | 720.64746                       | [M+HCOO]-       | Cer            | MS/MS                      | 0.0278                                               | 0.64                                                     |
| 625       | Cer(d38:1)         | negative       | 13.19          | 638.56891                       | [M+HCOO]-       | Cer            | MS/MS                      | 0.0071                                               | 0.55                                                     |
| 915       | Cer(d44:0)         | negative       | 15.16          | 724.68146                       | [M+HCOO]-       | Cer            | MS/MS                      | 0.0038                                               | 0.62                                                     |
| 116       | Linoleic acid      | negative       | 2.50           | 279.23273                       | [M-H]-          | FFA            | STD                        | 0.0387                                               | 0.65                                                     |
| 365       | PE(18:0/0:0)       | negative       | 2.09           | 480.31                          | [M-H]-          | PE             | MS/MS                      | 0.0316                                               | 0.66                                                     |
| 986       | PG(16:1/18:2)      | negative       | 4.84           | 743.48297                       | [M-H]-          | PG             | MS/MS                      | 0.0214                                               | 0.57                                                     |

Remarks: MSMS = lipids that were confirmed with fragment pattern of database; STD = lipids that were confirmed with authentic standards. Abbreviations: Cer, ceramide; FFA, free fatty acid; PE, phosphatidylethanolamine; PG, phosphatidylglycerol.

**Table S6. List of the mixture of 14 internal standards with corresponding statistical information in the lipidomics study using COVID-19 patients' and non-infected control subjects' plasma samples**

| Common Name            | Formula      | Detection mode | Adduct ion name | m/z      | Retention time (min) | CV of plasma samples | CV of QC samples |
|------------------------|--------------|----------------|-----------------|----------|----------------------|----------------------|------------------|
| Ceramide C17           | C35H69NO3    | Positive       | [M+H-H2O]+      | 534.5250 | 9.88                 | 21.97%               | 7.37%            |
| Ceramide C17           | C35H69NO3    | Positive       | [M+Na]+         | 574.5182 | 9.88                 | 18.96%               | 6.35%            |
| Cholesterol d7         | C27H39D7O    | Positive       | [M-H2O+H]+      | 376.3960 | 5.89                 | 21.07%               | 3.06%            |
| DG (12:0/12:0/0:0)     | C27H52O5     | Positive       | [M+Na]+         | 479.3728 | 4.60                 | 10.16%               | 2.08%            |
| DG (12:0/12:0/0:0)     | C27H52O5     | Positive       | [M+NH4]+        | 474.4171 | 4.60                 | 14.90%               | 1.24%            |
| DG (18:1/2:0/0:0)      | C23H42O5     | Positive       | [M+Na]+         | 421.2930 | 2.58                 | 4.08%                | 1.49%            |
| DG (18:1/2:0/0:0)      | C23H42O5     | Positive       | [M+NH4]+        | 416.3379 | 2.58                 | 9.20%                | 1.76%            |
| LPC (17:0)             | C25H52NO7P   | Positive       | [M+H]+          | 510.3575 | 1.59                 | 20.99%               | 2.30%            |
| LPE (17:1)             | C22H44NO7P   | Positive       | [M+H]+          | 466.2947 | 1.29                 | 13.51%               | 3.04%            |
| PAF C-16-d4            | C26H50D4NO7P | Positive       | [M+H]+          | 528.3976 | 1.70                 | 12.40%               | 2.34%            |
| PC (12:0/13:0)         | C33H66NO8P   | Positive       | [M+H]+          | 636.4587 | 3.31                 | 12.53%               | 3.38%            |
| PE (17:0/17:0)         | C39H78NO8P   | Positive       | [M+H]+          | 720.5572 | 11.57                | 19.82%               | 7.12%            |
| SM (17:0)              | C40H81N2O6P  | Positive       | [M+H]+          | 717.5917 | 7.30                 | 14.42%               | 3.65%            |
| Sphingosine (d17:1)    | C17H35NO2    | Positive       | [M+H]+          | 286.2730 | 1.14                 | 14.11%               | 1.54%            |
| TG (17:0/17:1/17:0)-d5 | C54H97D5O6   | Positive       | [M+Na]+         | 874.7945 | 16.12                | 16.81%               | 5.31%            |
| Ceramide (d18:1/17:0)  | C35H69NO3    | Negative       | [M-H]-          | 550.5178 | 10.10                | 17.07%               | 6.57%            |
| Arachidonic acid-d8    | C20H24D8O2   | Negative       | [M-H]-          | 311.2837 | 2.04                 | 23.36%               | 7.12%            |
| LPE (17:1)             | C22H44NO7P   | Negative       | [M-H]-          | 464.2787 | 1.27                 | 13.13%               | 4.55%            |
| PE (17:0/17:0)         | C39H78NO8P   | Negative       | [M-H]-          | 718.5399 | 11.08                | 24.98%               | 4.98%            |
| PG (17:0/17:0)         | C40H79O10P   | Negative       | [M-H]-          | 749.5316 | 7.93                 | 13.52%               | 3.58%            |

Abbreviations: DG, diacylglycerol; LPC, lysophosphatidylcholine; LPE, lysophosphatidylethanolamine; PC, phosphatidylcholine; PE, phosphatidylethanolamine; PG, phosphatidylglycerol; SM, sphingomyelin; TG, triacylglycerol.

**Table S7. Lipids that were significantly different between COVID-19 patients and non-infected control subjects**

| Lipids id | Significant lipids                     | Detection mode | Retention time (min) | Accurate mass in detection mode | Adduct ion name       | Lipid species | Identification information | p-Value in COVID-19 Patients vs Healthy volunteers | Fold change in COVID-19 Patients vs Healthy volunteers |
|-----------|----------------------------------------|----------------|----------------------|---------------------------------|-----------------------|---------------|----------------------------|----------------------------------------------------|--------------------------------------------------------|
| 112       | Carnitine 10:2                         | positive       | 0.655                | 312.21759                       | [M] <sup>+</sup>      | Car           | MS/MS                      | 0.0085                                             | 0.47                                                   |
| 70        | Carnitine 8:1                          | positive       | 0.646                | 286.20163                       | [M] <sup>+</sup>      | Car           | MS/MS                      | 0.0002                                             | 0.50                                                   |
| 138       | Carnitine 11:1                         | positive       | 0.688                | 328.2485                        | [M] <sup>+</sup>      | Car           | MS/MS                      | 0.0007                                             | 0.58                                                   |
| 117       | Carnitine 10:1                         | positive       | 0.686                | 314.23355                       | [M] <sup>+</sup>      | Car           | MS/MS                      | 0.0432                                             | 0.60                                                   |
| 252       | O-oleoylcarnitine                      | positive       | 1.404                | 426.358                         | [M] <sup>+</sup>      | Car           | MS/MS                      | 0.0001                                             | 1.62                                                   |
| 859       | (3'-sulfo)Gal $\beta$ -Cer(d18:1/16:0) | negative       | 4.617                | 778.51257                       | [M-H] <sup>-</sup>    | Cer           | MS/MS                      | 0.0001                                             | 0.66                                                   |
| 1138      | LacCer(d18:1/16:0)                     | negative       | 6.252                | 906.61615                       | [M+HCOO] <sup>-</sup> | Cer           | MS/MS                      | 0.0000                                             | 1.50                                                   |
| 1203      | LacCer(d18:1/24:1(15Z))                | positive       | 13.099               | 1016.72742                      | [M+HCOO] <sup>-</sup> | Cer           | MS/MS                      | 0.0012                                             | 1.51                                                   |
| 531       | Cer(d18:1/24:1)                        | negative       | 13.829               | 646.61102                       | [M-H] <sup>-</sup>    | Cer           | MS/MS                      | 0.0000                                             | 1.55                                                   |
| 472       | Cer(d18:1/18:0)                        | negative       | 11.693               | 610.54065                       | [M+HCOO] <sup>-</sup> | Cer           | STD                        | 0.0001                                             | 2.33                                                   |
| 475       | Cer(d18:0/18:0)                        | negative       | 12.844               | 612.55646                       | [M+HCOO] <sup>-</sup> | Cer           | STD                        | 0.0110                                             | 2.75                                                   |
| 1501      | SM(43:2)                               | positive       | 13.396               | 849.67871                       | [M+H] <sup>+</sup>    | SM            | MS/MS                      | 0.0266                                             | 1.58                                                   |
| 918       | SM(36:0)                               | positive       | 9.353                | 733.62256                       | [M+H] <sup>+</sup>    | SM            | MS/MS                      | 0.0027                                             | 1.77                                                   |
| 1024      | SM(38:2)                               | positive       | 14.17                | 757.62408                       | [M+Na] <sup>+</sup>   | SM            | MS/MS                      | 0.0012                                             | 1.88                                                   |
| 1009      | SM(38:3)                               | positive       | 9.317                | 755.60309                       | [M+Na] <sup>+</sup>   | SM            | MS/MS                      | 0.0013                                             | 2.10                                                   |
| 226       | PE(O-16:0/0:0)                         | negative       | 1.637                | 438.29785                       | [M-H] <sup>-</sup>    | Ether-LPE     | MS/MS                      | 0.0350                                             | 0.42                                                   |
| 251       | PE(O-18:2/0:0)                         | negative       | 1.661                | 462.29794                       | [M-H] <sup>-</sup>    | Ether-LPE     | MS/MS                      | 0.0337                                             | 0.50                                                   |
| 1007      | PC(O-35:4)                             | positive       | 6.948                | 754.57074                       | [M+H] <sup>+</sup>    | Ether-PC      | MS/MS                      | 0.0000                                             | 0.33                                                   |
| 1073      | PC(O-18:0/18:5)                        | positive       | 6.654                | 766.5744                        | [M+H] <sup>+</sup>    | Ether-PC      | MS/MS                      | 0.0014                                             | 0.35                                                   |
| 951       | PC(O-16:0/20:5)                        | negative       | 6.509                | 810.5658                        | [M-H] <sup>-</sup>    | Ether-PC      | MS/MS                      | 0.0016                                             | 0.35                                                   |
| 1193      | PC(O-38:8)                             | positive       | 6.661                | 788.5556                        | [M+H] <sup>+</sup>    | Ether-PC      | MS/MS                      | 0.0039                                             | 0.35                                                   |
| 904       | PC(O-33:2)                             | positive       | 7.272                | 730.5752                        | [M+H] <sup>+</sup>    | Ether-PC      | MS/MS                      | 0.0000                                             | 0.40                                                   |
| 1216      | PC(O-16:0/22:6)                        | positive       | 6.779                | 792.59009                       | [M+H] <sup>+</sup>    | Ether-PC      | MS/MS                      | 0.0033                                             | 0.45                                                   |
| 967       | PC(O-14:0/20:2)                        | positive       | 8.399                | 744.59192                       | [M+H] <sup>+</sup>    | Ether-PC      | MS/MS                      | 0.0001                                             | 0.52                                                   |

|      |                    |          |        |           |                                      |          |       |        |      |
|------|--------------------|----------|--------|-----------|--------------------------------------|----------|-------|--------|------|
| 1016 | PC(O-35:3)         | positive | 8.813  | 756.58789 | [M+H] <sup>+</sup>                   | Ether-PC | MS/MS | 0.0072 | 0.59 |
| 1055 | PC(O-36:6)         | positive | 8.035  | 764.55658 | [M+H] <sup>+</sup>                   | Ether-PC | MS/MS | 0.0014 | 0.62 |
| 953  | PC(O-34:3)         | positive | 8.036  | 742.57581 | [M+H] <sup>+</sup>                   | Ether-PC | MS/MS | 0.0006 | 0.65 |
| 1096 | PC(O-36:3)         | positive | 8.573  | 770.60449 | [M+H] <sup>+</sup>                   | Ether-PC | MS/MS | 0.0011 | 0.66 |
| 987  | PE(O-18:1/20:5)    | positive | 9.173  | 750.54388 | [M+H] <sup>+</sup>                   | Ether-PE | MS/MS | 0.0334 | 0.28 |
| 755  | P(O-18:2/20:4)     | negative | 8.962  | 748.52795 | [M-H] <sup>-</sup>                   | Ether-PE | MS/MS | 0.0239 | 0.30 |
| 869  | PE(P-16:0/20:5)    | positive | 6.875  | 722.51227 | [M+H] <sup>+</sup>                   | Ether-PE | MS/MS | 0.0048 | 0.32 |
| 683  | PE(O-16:1/20:5)    | negative | 6.721  | 720.49683 | [M-H] <sup>-</sup>                   | Ether-PE | MS/MS | 0.0110 | 0.32 |
| 688  | PE(O-16:1/20:4)    | negative | 7.033  | 722.51099 | [M-H] <sup>-</sup>                   | Ether-PE | MS/MS | 0.0001 | 0.41 |
| 787  | PE(O-16:0/18:3)    | positive | 8.741  | 700.52716 | [M+H] <sup>+</sup>                   | Ether-PE | MS/MS | 0.0000 | 0.46 |
| 894  | PE(P-18:0/18:2)    | positive | 11.631 | 728.55988 | [M+H] <sup>+</sup>                   | Ether-PE | MS/MS | 0.0000 | 0.48 |
| 887  | PE(O-18:1/18:3)    | positive | 8.735  | 726.54431 | [M+H] <sup>+</sup>                   | Ether-PE | MS/MS | 0.0107 | 0.52 |
| 754  | PE (P-16:0/22:5)   | negative | 7.875  | 748.52771 | [M-H] <sup>-</sup>                   | Ether-PE | MS/MS | 0.0043 | 0.56 |
| 775  | PE(O-18:0/20:4)    | negative | 11.348 | 752.5592  | [M-H] <sup>-</sup>                   | Ether-PE | MS/MS | 0.0030 | 0.57 |
| 820  | LNAPE(18:0/N-20:4) | negative | 13.233 | 766.53961 | [M-H] <sup>-</sup>                   | LNAPE    | MS/MS | 0.0000 | 3.30 |
| 1071 | PC(32:2/0:0)       | positive | 8.383  | 766.573   | [M+Na] <sup>+</sup>                  | LPC      | MS/MS | 0.0000 | 0.45 |
| 611  | PC(26:0/0:0)       | positive | 6.126  | 636.49646 | [M+H] <sup>+</sup>                   | LPC      | MS/MS | 0.0122 | 1.50 |
| 301  | PE(20:5/0:0)       | negative | 0.971  | 498.26218 | [M-H] <sup>-</sup>                   | LPE      | MS/MS | 0.0262 | 0.56 |
| 942  | PC(34:4)           | positive | 6.109  | 740.55646 | [M+H] <sup>+</sup>                   | PC       | MS/MS | 0.0000 | 0.28 |
| 1273 | PC(16:1/22:6)      | positive | 4.727  | 804.55341 | [M+H] <sup>+</sup>                   | PC       | MS/MS | 0.0309 | 0.51 |
| 1467 | PC(40:2)           | positive | 13.388 | 842.66302 | [M+H] <sup>+</sup>                   | PC       | MS/MS | 0.0003 | 0.54 |
| 1254 | PC(37:3)           | positive | 8.35   | 798.60193 | [M+H] <sup>+</sup>                   | PC       | MS/MS | 0.0192 | 0.62 |
| 1261 | PC(19:0/18:2)      | positive | 10.923 | 800.61725 | [M+H] <sup>+</sup>                   | PC       | MS/MS | 0.0011 | 0.63 |
| 1040 | PC(18:0/18:2)      | negative | 9.335  | 844.60492 | [M+CH <sub>3</sub> COO] <sup>-</sup> | PC       | MS/MS | 0.0216 | 1.73 |
| 935  | PE(18:0/22:6)      | negative | 4.991  | 804.51801 | [M-H] <sup>-</sup>                   | PE       | MS/MS | 0.0049 | 3.14 |
| 1081 | PE(18:0/20:4)      | positive | 9.7    | 768.55402 | [M+H] <sup>+</sup>                   | PE       | MS/MS | 0.0432 | 1.52 |
| 941  | PE(36:4)           | positive | 7.307  | 740.52368 | [M+H] <sup>+</sup>                   | PE       | MS/MS | 0.0028 | 1.78 |
| 1054 | PE(38:6)           | positive | 6.117  | 764.52362 | [M+H] <sup>+</sup>                   | PE       | MS/MS | 0.0385 | 1.94 |
| 672  | PE(16:0/18:1)      | negative | 9.353  | 716.52338 | [M-H] <sup>-</sup>                   | PE       | MS/MS | 0.0009 | 2.56 |

|      |          |          |       |           |                      |    |       |        |      |
|------|----------|----------|-------|-----------|----------------------|----|-------|--------|------|
| 1630 | PI(36:2) | positive | 6.983 | 880.59125 | [M+NH4] <sup>+</sup> | PI | MS/MS | 0.0003 | 1.66 |
|------|----------|----------|-------|-----------|----------------------|----|-------|--------|------|

---

**Remarks:** MSMS = lipids that were confirmed with fragment pattern of database; STD = lipids that were confirmed with authentic standards; The 'O-' prefix is used to indicate the presence of an alkyl ether substituent, e.g., PC (O-16:0/0:0), whereas the 'P-' prefix is used for the 1Z-alkenyl ether (Plasmalogen) substituent, e.g., PE (P-16:0/16:0). Abbreviations: Cer, ceramide; EtherLPE, ether-linked lysophosphatidylethanolamine; EtherPC, ether-linked phosphatidylcholine; EtherPE, ether-linked phosphatidylethanolamine; LNAPE, n-acyl-lysophosphatidylethanolamine; LPC, lysophosphatidylcholine; PC, phosphatidylcholine; PE, phosphatidylethanolamine; PI, phosphatidylinositol; SM, sphingomyelin.
